# Supplementary material for: Nanoporous Gold Nanocomposites as a Versatile Platform for Plasmonic Engineering and Sensing
Source: MDPI journal article supplement (doi:10.3390/s17071519), 2017-06-28
Supplement: s1 [file s1]

## Supporting Information

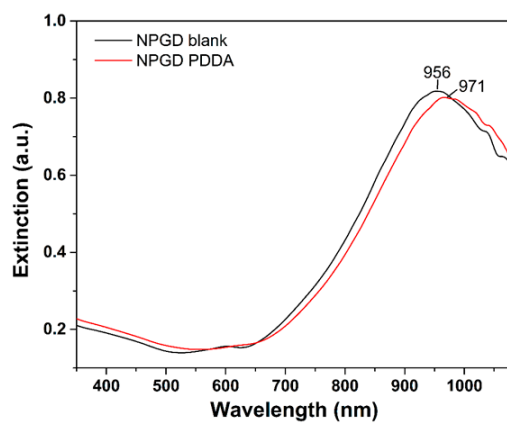

**Figure S1.** Extinction spectra of NPGD before and after adsorbing PDDA.

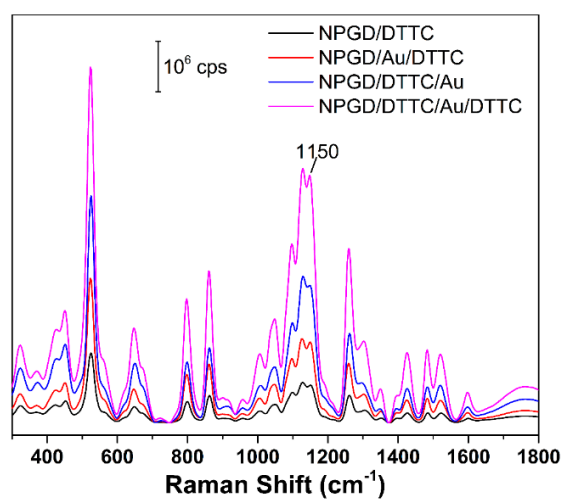

**Figure S2.** SERS spectra of DTTC on NPGD/13 nm AuNP composites.
